# Supplementary material
Source: publisher figshare collection journal article supplement (https://karger.figshare.com/ndownloader/files/24618812)
Supplement: Supplementary file 1 [file 24618812]

ENE507364 Supplementary figure legends

Supplementary Fig. 1. The heat map of all differentially expressed miRNAs in ischemic stroke.

Each row represents a differentially expressed miRNA and each column, a sample. The differentially expressed miRNA clustering tree is shown on the right. The colour scale illustrates the relative level of differentially expressed miRNA expression: red, below the reference channel; green, higher than the reference.

Supplementary Fig. 2. The heat map of all differentially expressed mRNAs in ischemic stroke.

Each row represents a differentially expressed mRNA and each column, a sample. The differentially expressed mRNA clustering tree is shown on the right. The colour scale illustrates the relative level of differentially expressed mRNA expression: red, below the reference channel; green, higher than the reference.
